# Supplementary material
Source: PubMed Central journal article supplement (PMC10115170)

## **Supplemental Material**

### **Supplemental Tables (1-8)**

Supplemental Table 1: Data availability on neurological manifestations and complication by contributing study/database.

Supplemental Table 2: Cohort characteristics by geographic region and income classification

Supplemental Table 3: Data completeness summary.

Supplemental Table 4: Baseline characteristics of the ICU cohort.

Supplementary Table 5: Neurological complications in ICU patients stratified by IMV and ECMO/ECLS use.

Supplemental Table 6: Multivariable model estimates for reported neurological complications during hospitalisation.

Supplementary Table 7: Multivariable model estimates for in-hospital mortality, ICU, and non-ICU cohorts.

Supplemental Table 8: Additional reports neurological complications based on free-text entries.

### **Supplemental Figures (1-4)**

Supplemental Figure 1: Cumulative COVID-19 hospitalisations over time.

Supplemental Figure 2: Results of multivariable analysis for in-hospital mortality.

Supplemental Figure 3: Estimated age-related prevalence of reported neurological manifestations at hospital admission.

Supplemental Figure 4: Stacked probability plot, final disposition up to 100 days following hospitalisation with SARS-CoV-2 infection.

**Supplemental Table 1: Data availability on neurological manifestations and complication by contributing study/database.**

Availability was defined based on data collection for prespecified fields in study case report forms.

| Study ID                                                 | ISARIC REDCap platform |                              |                             |                              | Locally-hosted REDCap or other data management system |              |           |           |            |            |
|----------------------------------------------------------|------------------------|------------------------------|-----------------------------|------------------------------|-------------------------------------------------------|--------------|-----------|-----------|------------|------------|
|                                                          | CVCCPUK<br>(UK-CCP)    | CVVECMO<br>(COVID-19<br>CCC) | CVVCORE<br>(ISARIC<br>Core) | CVRAPID<br>(ISARIC<br>Rapid) | CVTDWXD                                               | CVPRQTA      | CVPSICL   | CVKBQEI   | CVKMNLG    | CVCSXGF    |
| <b>Total patients analysed</b>                           | <b>129,946</b>         | <b>2,377</b>                 | <b>15,104</b>               | <b>5,520</b>                 | <b>1,457</b>                                          | <b>6,190</b> | <b>99</b> | <b>26</b> | <b>123</b> | <b>397</b> |
| ICU                                                      | 20,748                 | 2,377                        | 8,955                       | 2,233                        | 1,104                                                 | 198          | 15        | 16        | 37         | 397        |
| Non-ICU                                                  | 109,198                | 0                            | 6,149                       | 3,287                        | 353                                                   | 5,992        | 84        | 10        | 86         | 0          |
| <b>Neurological manifestations at hospitalisation</b>    |                        |                              |                             |                              |                                                       |              |           |           |            |            |
| Alternated consciousness                                 |                        |                              |                             |                              |                                                       |              |           |           |            |            |
| Fatigue                                                  |                        |                              |                             |                              |                                                       |              |           |           |            |            |
| Anosmia                                                  |                        |                              |                             |                              |                                                       |              |           |           |            |            |
| Dysguesia                                                |                        |                              |                             |                              |                                                       |              |           |           |            |            |
| Myalgia                                                  |                        |                              |                             |                              |                                                       |              |           |           |            |            |
| Seizures                                                 |                        |                              |                             |                              |                                                       |              |           |           |            |            |
| <b>Neurological complications during hospitalisation</b> |                        |                              |                             |                              |                                                       |              |           |           |            |            |
| Stoke <sup>a</sup>                                       |                        |                              |                             |                              |                                                       |              |           |           |            |            |
| CNS infection <sup>b</sup>                               |                        |                              |                             |                              |                                                       |              |           |           |            |            |
| Seizures <sup>c</sup>                                    |                        |                              |                             |                              |                                                       |              |           |           |            |            |

<sup>a</sup> Stroke may be a clinical diagnosis, with or without supportive radiological findings

<sup>b</sup> CNS infection includes meningitis or encephalitis

<sup>c</sup> Seizure regardless of cause (e.g. febrile or due to epilepsy)

**Supplemental Table 2: Cohort summary by geographic region and income classification** showing the number of patients analysed by major geographic region and subregion.

| <b>Characteristic</b>           | <b>Number of patients</b> |
|---------------------------------|---------------------------|
| <b>Geographic region</b>        |                           |
| Sub-region                      |                           |
| <b>Africa</b>                   |                           |
| Sub-Saharan Africa              | 119                       |
| <b>Americas</b>                 |                           |
| Latin America and the Caribbean | 2,508                     |
| Northern America                | 5,853                     |
| <b>Asia</b>                     |                           |
| Eastern Asia                    | 97                        |
| South-eastern Asia              | 6,648                     |
| Southern Asia                   | 6,964                     |
| Western Asia                    | 343                       |
| <b>Europe</b>                   |                           |
| Eastern Europe                  | 905                       |
| Northern Europe                 | 131,227                   |
| Southern Europe                 | 1,497                     |
| Western Europe                  | 4,666                     |
| <b>Oceania</b>                  |                           |
| Australia and New Zealand       | 412                       |
| <b>Income classification</b>    |                           |
| High                            | 145 006                   |
| Upper middle                    | 9,081                     |
| Low middle                      | 7,053                     |
| Low                             | 99                        |

**Supplemental Table 3: Data completeness summary** for baseline characteristics, neurological manifestations, and neurological complications

Data completeness on variables used to defined inclusion/exclusion criteria (age, sex, clinical outcome) are not reported.

| <b>Characteristic</b>                                                 | <b>All patients<br/>(n=161,239)</b> | <b>ICU cohort<br/>(n = 35,993)</b> | <b>Non-ICU<br/>cohort<br/>(n = 125,246)</b> |
|-----------------------------------------------------------------------|-------------------------------------|------------------------------------|---------------------------------------------|
| <b>Baseline characteristics</b>                                       |                                     |                                    |                                             |
| Age, years                                                            | 100%                                | 100%                               | 100%                                        |
| Sex                                                                   | 100%                                | 100%                               | 100%                                        |
| Days from first symptom of COVID-19 to hospitalisation                | 78.2%                               | 86.4%                              | 75.8%                                       |
| Ethnicity                                                             | 82.7%                               | 76.3%                              | 84.5%                                       |
| Asthma                                                                | 98.2%                               | 98.7%                              | 98.0%                                       |
| Chronic Cardiac Disease <sup>a</sup>                                  | 98.2%                               | 98.7%                              | 98.0%                                       |
| Chronic Kidney Disease <sup>b</sup>                                   | 98.1%                               | 98.7%                              | 97.9%                                       |
| Chronic Neurological Disorder <sup>c</sup>                            | 97.9%                               | 98.6%                              | 97.7%                                       |
| Chronic Pulmonary Disease <sup>d</sup>                                | 98.2%                               | 98.7%                              | 98.1%                                       |
| Dementia <sup>e</sup>                                                 | 94.1%                               | 92.6%                              | 94.6%                                       |
| Diabetes                                                              | 98.6%                               | 98.9%                              | 98.5%                                       |
| Former/Current Smoker                                                 | 59.4%                               | 51.1%                              | 61.7%                                       |
| Hypertension                                                          | 84.6%                               | 87.8%                              | 83.7%                                       |
| Liver Disease                                                         | 99.7%                               | 99.5%                              | 99.8%                                       |
| Obesity                                                               | 86.3%                               | 89.1%                              | 85.6%                                       |
| GCS at admission                                                      | 39.8%                               | 54.1%                              | 35.7%                                       |
| <b>Neurological manifestations at hospitalisation <sup>f</sup></b>    |                                     |                                    |                                             |
| Altered consciousness                                                 | 92.2%                               | 95.8%                              | 91.2%                                       |
| Anosmia                                                               | 69.7%                               | 73.2%                              | 68.8%                                       |
| Dysgeusia                                                             | 68.6%                               | 71.4%                              | 67.8%                                       |
| Fatigue                                                               | 91.6%                               | 93.9%                              | 91.0%                                       |
| Myalgia                                                               | 88.1%                               | 91.0%                              | 87.3%                                       |
| Seizure                                                               | 89.9%                               | 94.8%                              | 88.5%                                       |
| <b>Neurological complications during hospitalisation <sup>f</sup></b> |                                     |                                    |                                             |
| Stroke                                                                | 96.2%                               | 93.5%                              | 97.0%                                       |
| CNS infection                                                         | 99.5%                               | 98.6%                              | 99.8%                                       |
| Seizures                                                              | 99.5%                               | 98.7%                              | 99.8%                                       |
| <b>Final disposition</b>                                              |                                     |                                    |                                             |
| Outcome                                                               | 100%                                | 100%                               | 100%                                        |
| Days from hospitalisation to outcome                                  | 100%                                | 100%                               | 100%                                        |

Where ICU, intensive care unit; GCS, Glasgow coma scale.

<sup>a</sup> Chronic cardiac disease: any of coronary artery disease, heart failure, congenital heart disease, cardiomyopathy, or rheumatic heart disease, not hypertension.

<sup>b</sup> Chronic kidney disease: chronic estimated glomerular filtration rate < 60 mL/min/1.73 m<sup>2</sup> or history of kidney transplantation.

<sup>c</sup> Chronic neurologic disease: any of cerebral palsy, multiple sclerosis, motor neuron disease, muscular dystrophy, myasthenia gravis, Parkinson's disease, stroke, severe learning difficult

<sup>d</sup> Chronic pulmonary disease: chronic obstructive pulmonary disease (chronic bronchitis, chronic obstructive pulmonary disease (COPD), emphysema), cystic fibrosis, bronchiectasis, interstitial lung disease

<sup>e</sup> Dementia: Clinical diagnosis of dementia

<sup>f</sup> Across all study case report forms. See Supplemental Table 1 for data availability for all neurological variables by study.

**Supplemental Table 4: Baseline characteristics of the ICU cohort.** Categorical variables are reported as frequencies (%); continuous variables are reported as medians (inter-quartile range)

| <b>Characteristic</b>                              | <b>ICU cohort</b> |
|----------------------------------------------------|-------------------|
| Admitted to ICU on the same day as hospitalization | 15,961 (52.3%)    |
| <b>Treatment during ICU admission</b>              |                   |
| Invasive mechanical ventilation (IMV)              | 18,767 (52.9%)    |
| Extra-corporal membrane oxygenation (ECMO)         | 770 (2.2%)        |
| <b>Days from ICU to outcome</b>                    |                   |
| Death                                              | 9 (5 – 16)        |
| Discharged                                         | 7 (4 – 14)        |
| Continued hospitalization                          | 6 (3 – 14)        |
| Transferred                                        | 10 (4 – 21)       |

**Supplemental Table 5: Neurological complications in ICU patients stratified by IMV and ECMO/ECLS use.** Estimates are reported as estimate percentages and 95% confidence intervals. OR: Odds ratio; CI: Confidence interval; ECMO/ELCS: Extracorporeal Membrane Oxygenation/Extracorporeal Life Support

| <b>Received at any time during hospitalisation</b> | <b>Yes<br/>Cases/Total<br/>Estimate (95% CI)</b> | <b>No<br/>Cases/Total<br/>Estimate (95% CI)</b> | <b>Unadjusted OR<br/>Estimate (95% CI)<br/>p-value</b> |
|----------------------------------------------------|--------------------------------------------------|-------------------------------------------------|--------------------------------------------------------|
| <b>CNS infection</b>                               |                                                  |                                                 |                                                        |
| Invasive mechanical ventilation                    | 129/18,481<br>0.7 (0.59 to 0.83)                 | 33/16,443<br>0.2 (0.14 to 0.28)                 | 3.5 (2.38-5.13)<br><0.001                              |
| ECMO/ECLS                                          | 6/752<br>0.8 (0.36 to 1.8)                       | 151/33,760<br>0.45 (0.38 to 0.52)               | 1.79 (0.79-4.06)<br>0.164                              |
| <b>Seizure (In-hospital)</b>                       |                                                  |                                                 |                                                        |
| Invasive mechanical ventilation                    | 353/18,482<br>1.9 (1.7 to 2.1)                   | 144/16,467<br>0.87 (0.74 to 1)                  | 2.21 (1.82-2.68)<br><0.001                             |
| ECMO/ECLS                                          | 21/752<br>2.8 (1.8 to 4.2)                       | 474/33,784<br>1.4 (1.3 to 1.5)                  | 2.02 (1.3-3.14)<br><0.001                              |
| <b>Stroke</b>                                      |                                                  |                                                 |                                                        |
| Invasive mechanical ventilation                    | 407/17,329<br>2.3 (2.1 to 2.6)                   | 173/15,772<br>1.1 (0.95 to 1.3)                 | 2.17 (1.81-2.59)<br><0.001                             |
| ECMO/ECLS                                          | 52/718<br>7.2 (5.6 to 9.4)                       | 525/31,971<br>1.6 (1.5 to 1.8)                  | 4.68 (3.48-6.28)<br><0.001                             |

**Supplemental Table 6: Multivariable model estimates for reported neurological complications during hospitalisation.**  
Estimates are reported as an odds ratio (OR) with 95% confidence interval.

| <b>Parameter</b>                | <b>CNS infection</b>  | <b>Seizure</b>         | <b>Stroke</b>         |
|---------------------------------|-----------------------|------------------------|-----------------------|
| Intercept                       | 0.001 (0.000 – 0.002) | 0.002 (0.001 – 0.003)  | 0.003 (0.002 – 0.004) |
| Altered consciousness           | 4.82 (3.64 to 6.37)   | 1.70 (1.49 to 1.95)    | 1.92 (1.74 to 2.12)   |
| Chronic cardiac disease         | 0.99 (0.72 to 1.35)   | 1.04 (0.91 to 1.20)    | 1.09 (0.99 to 1.20)   |
| Chronic neurological disorder   | 0.66 (0.44 to 1.0)    | 2.85 (2.5 to 3.25)     | 2.12 (1.9 to 2.36)    |
| Dementia                        | 0.85 (0.53 to 1.37)   | 1 (0.84 to 1.19)       | 0.68 (0.60 to 0.78)   |
| Diabetes Mellitus               | 1.07 (0.82 to 1.4)    | 1.0 (0.87 to 1.14)     | 1.02 (0.93 to 1.12)   |
| Hypertension                    | 1.27 (0.97 to 1.66)   | 1.05 (0.89 to 1.23)    | 1.34 (1.20 to 1.48)   |
| Fatigue/Malaise                 | 0.84 (0.64 to 1.11)   | 0.68 (0.59 to 0.80)    | 0.63 (0.57 to 0.69)   |
| Myalgia                         | 0.93 (0.65 to 1.34)   | 0.67 (0.54 to 0.84)    | 0.78 (0.66 to 0.93)   |
| Seizures at admission           | 7.66 (5.06 to 11.58)  | 72.54 (62.98 to 83.56) | 2.38 (1.86 to 3.04)   |
| Sex: Male                       | 0.807 (0.64 to 1.02)  | 1.05 (0.94 to 1.18)    | 1.12 (1.02 to 1.22)   |
| Invasive mechanical ventilation | 2.75 (2.03 to 3.73)   | 3.36 (2.82 to 4.01)    | 2.88 (2.51 to 3.31)   |



|                                       |                     |                     |                     |
|---------------------------------------|---------------------|---------------------|---------------------|
| ECMO/ECLS                             | 0.79 (0.31 to 2.05) | 1.66 (0.99 to 2.80) | 3.77 (2.74 to 5.19) |
| Study cohort: ISARIC Core (reference) | 1 (-)               | 1 (-)               | 1 (-)               |
| Study cohort: CCP-UK                  | 1.03 (0.68 to 1.57) | 2.15 (1.64 to 2.81) | 2.88 (2.28 to 3.64) |
| Study cohort: COVID-19 CCC            | 2.53 (1.45 to 4.39) | 2.10 (1.38 to 3.20) | 3.13 (2.25 to 4.34) |
| Study cohort: Other                   | 0.86 (0.26 to 2.85) | 3.93 (2.34 to 6.62) | 2.26 (1.29 to 3.97) |

**Supplementary Table 7: Multivariable model estimates for in-hospital mortality, ICU and non-ICU cohorts.** Estimates are reported as an odds ratio (OR) with 95% confidence interval. Age and time polynomial effects are presented in Supplemental Figure 1.\*ICU cohort only

| Parameter                                  | ICU cohort          | non-ICU cohort      |
|--------------------------------------------|---------------------|---------------------|
| Intercept (Mean age = 60 years)            | 0.09 (0.08 to 0.1)  | 0.04 (0.04 to 0.05) |
| Stroke                                     | 1.57 (1.31 to 1.88) | 1.63 (1.46 to 1.81) |
| Seizures (in-hospital)                     | 1.04 (0.83 to 1.3)  | 1.5 (1.3 to 1.73)   |
| CNS infection                              | 1.19 (0.79 to 1.78) | 2.98 (2.07 to 4.28) |
| Invasive mechanical ventilation*           | 4.31 (4.05 to 4.6)  | –                   |
| ECMO/ECLS*                                 | 1.39 (1.18 to 1.65) | –                   |
| Sex: Male                                  | 1.16 (1.1 to 1.23)  | 1.4 (1.36 to 1.44)  |
| Ethnicity: Caucasian (reference)           | 1 (–)               | 1 (–)               |
| Ethnicity: Black                           | 0.78 (0.69 to 0.89) | 0.98 (0.88 to 1.11) |
| Ethnicity: Unknown                         | 0.92 (0.85 to 0.99) | 0.99 (0.94 to 1.04) |
| Ethnicity: Other                           | 0.98 (0.87 to 1.11) | 0.92 (0.82 to 1.02) |
| Ethnicity: Southeast Asian                 | 1.46 (1.35 to 1.57) | 1.01 (0.93 to 1.1)  |
| Chronic cardiac disease (not hypertension) | 1.16 (1.08 to 1.25) | 1.23 (1.19 to 1.27) |
| Chronic kidney disease                     | 1.48 (1.35 to 1.63) | 1.34 (1.3 to 1.39)  |
| Chronic pulmonary disease (not asthma)     | 1.68 (1.53 to 1.83) | 1.49 (1.44 to 1.55) |
| Diabetes Mellitus                          | 1.2 (1.13 to 1.27)  | 1.19 (1.15 to 1.23) |
| Obesity                                    | 1.01 (0.94 to 1.09) | 1.08 (1.02 to 1.14) |

|                                       |                     |                     |
|---------------------------------------|---------------------|---------------------|
| Hypertension                          | 0.97 (0.89 to 1.05) | 0.89 (0.85 to 0.92) |
| Study cohort: ISARIC Core (reference) | 1 (--)              | 1 (--)              |
| Study cohort: CCP-UK                  | 1.82 (1.69 to 1.96) | 2.9 (2.61 to 3.23)  |
| Study cohort: COVID-19 CCC*           | 1.52 (1.35 to 1.7)  | –                   |
| Study cohort: Other                   | 0.88 (0.74 to 1.05) | 0.25 (0.17 to 0.36) |

**Supplemental Table 8: Additional reports neurological complications based on free-text entries.**

Notes for main text as relevant:

- Across all records, we identified 52,801 free-text complications for 34,214 patients: 33,767 adults, 447 children.
- 77% of all free-text complications were recorded in the non-ICU cohort (26,365 vs. 7,849 in the ICU cohort).
- All almost free-text entries were from studies contributing to the ISARIC REDCap platform (n = 33,714 patients).

| <b>Complication</b> | <b>Number of records <sup>a</sup></b> |
|---------------------|---------------------------------------|
| Delirium            | 2,250                                 |
| Encephalopathy      | 135                                   |

<sup>a</sup> See Supplementary Data 1 for list of all records returned by complication

**Supplemental Figure 1: Cumulative COVID-19 hospitalisations over time** summarised by month and year of hospital admission. Cumulative numbers are stratified by ICU and non-ICU cohort

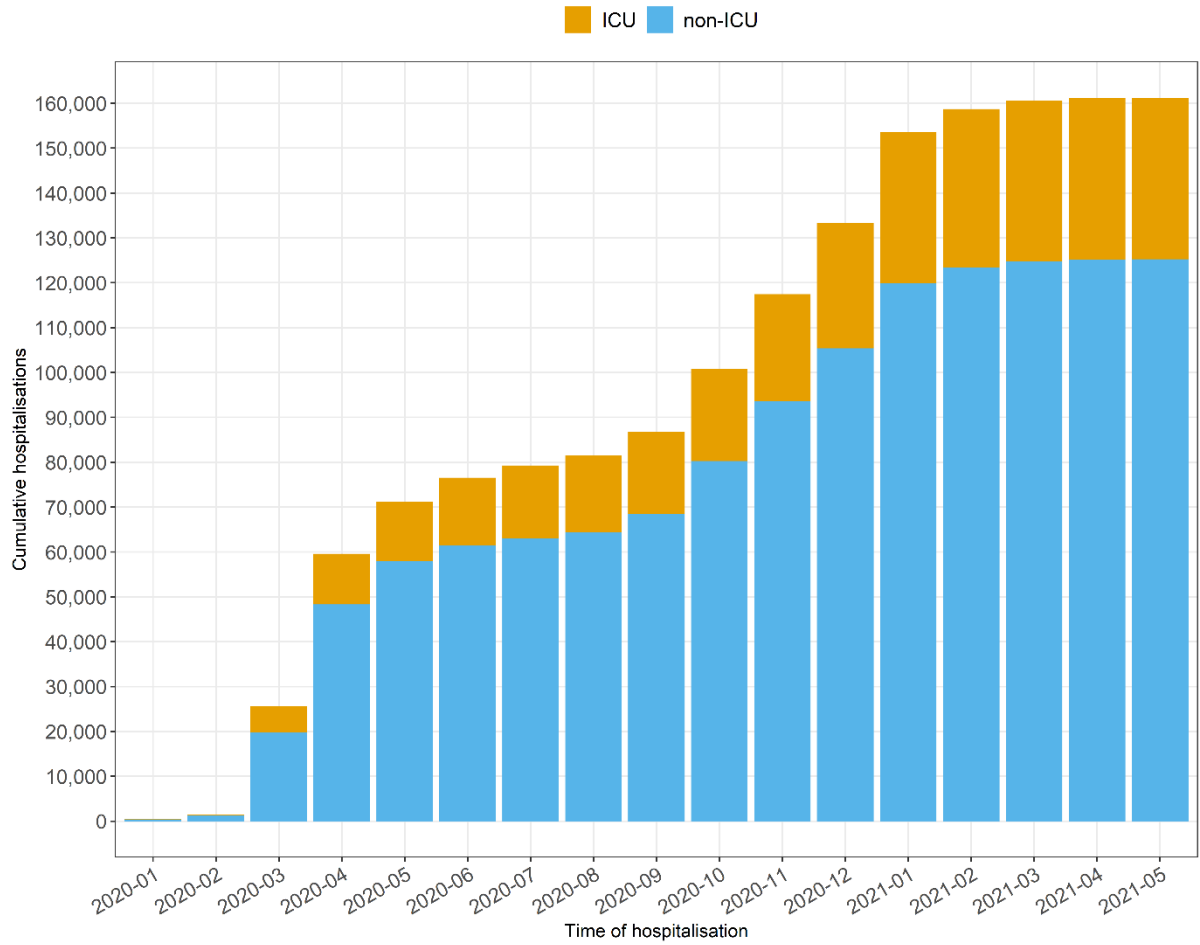

**Supplemental Figure 2: Results of multivariable analysis for in-hospital mortality** based on final disposition (logistic regression/Binomial GLM). Covariate associations are displayed as odds ratios (OR) with 95% confidence intervals.

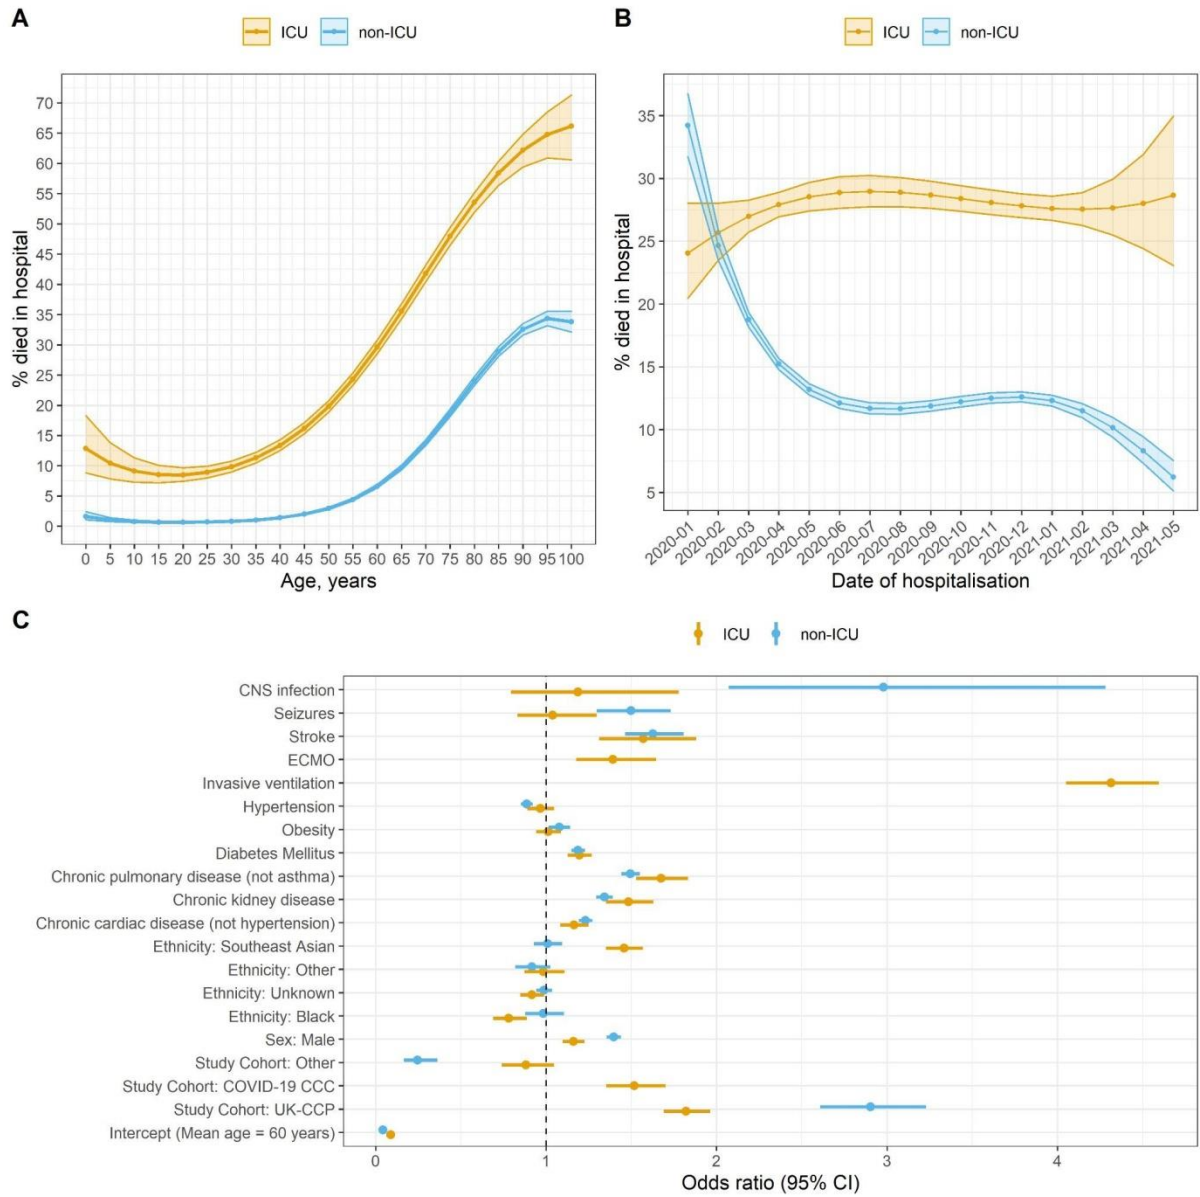

**Supplemental Figure 3: Estimated age-related prevalence of reported neurological manifestations at hospital admission.** Model estimates are stratified by ICU and non-ICU cohorts and plotted per 10-year age increase. Estimate uncertainty is presented as 95% confidence intervals.

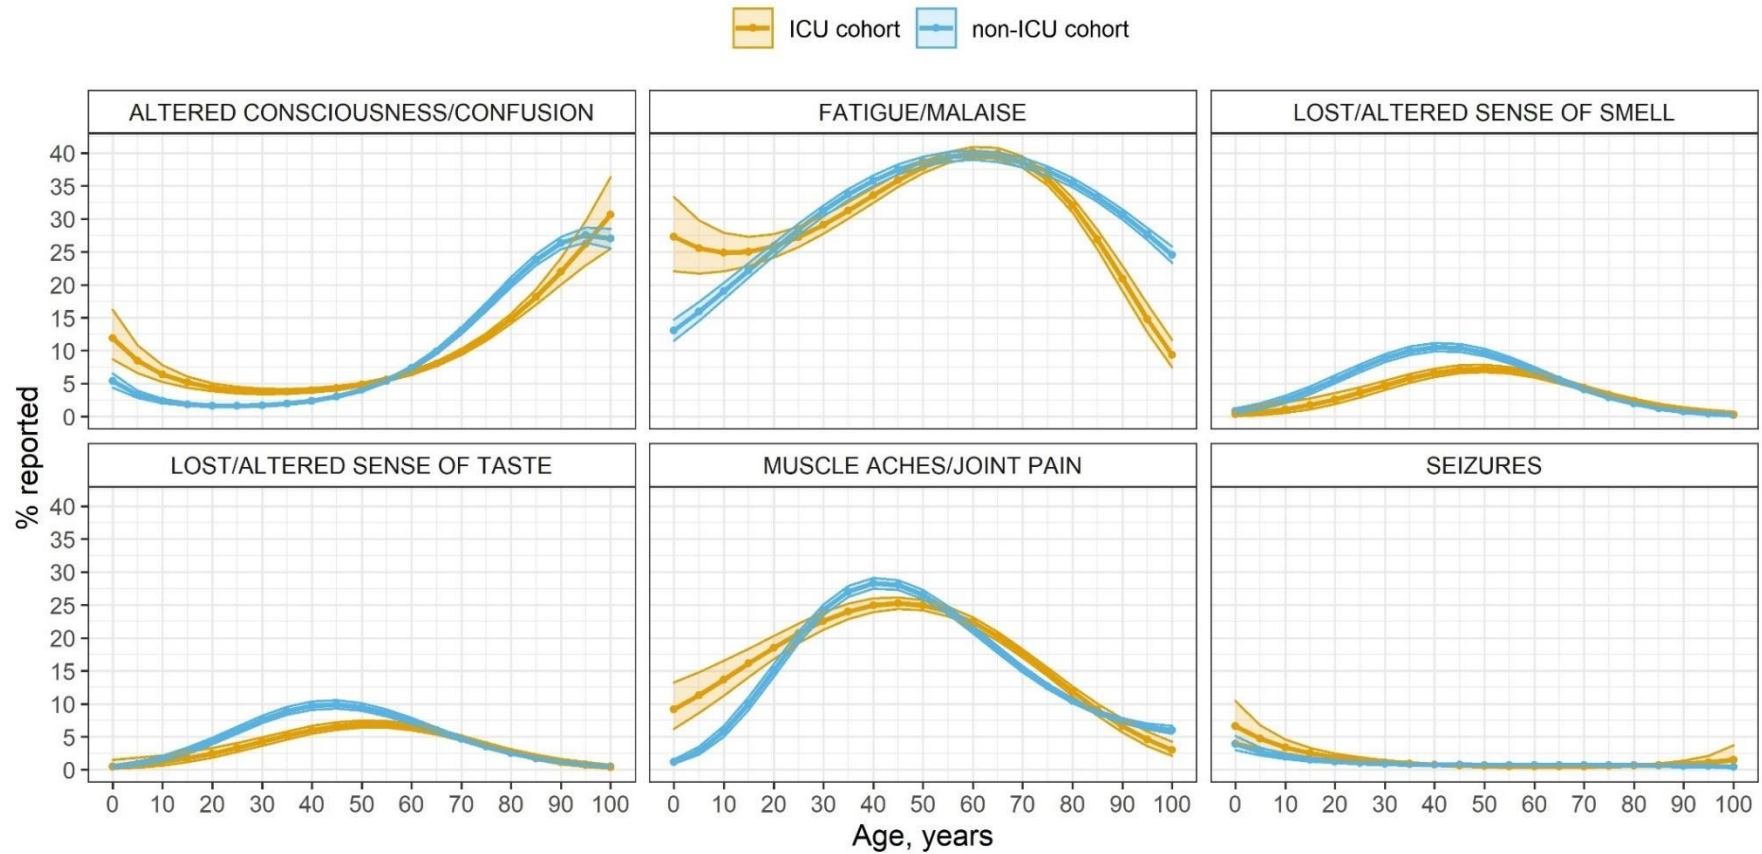

**Supplemental Figure 4: Stacked probability plot, final disposition up to 100 days following hospitalisation with SARS-CoV-2 infection. Stratification by ICU, non-ICU cohorts; all hospitalised patients**

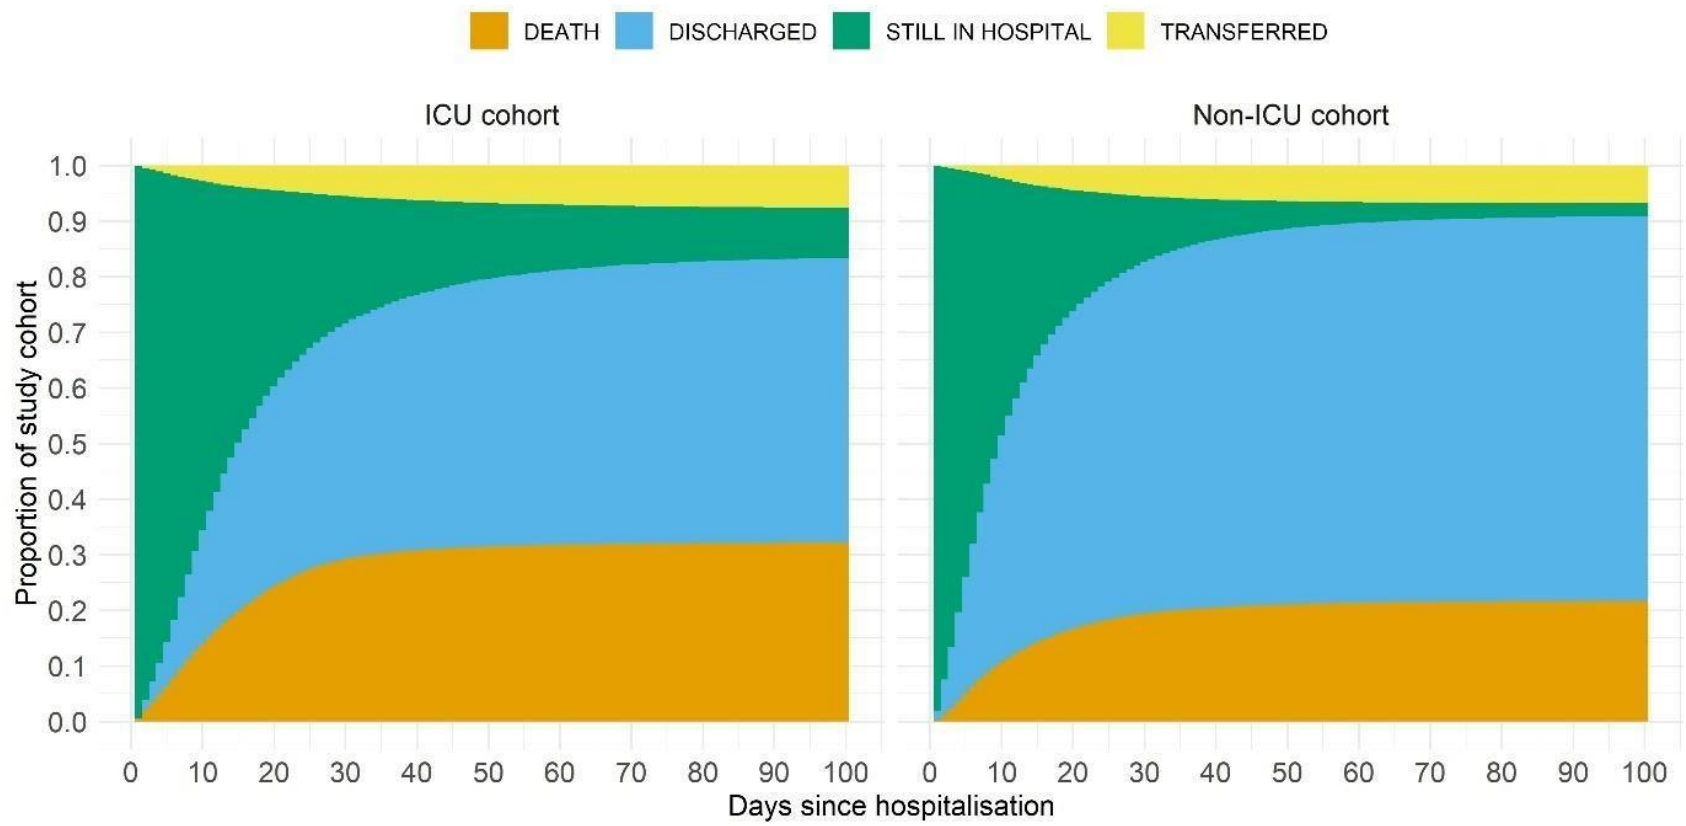

Supplement: awac332_supplementary_data.pdf [file awac332_supplementary_data.pdf]
